# Supplementary material for: Intronic CNVs and gene expression variation in human populations
Source: PubMed Central journal article supplement (PMC6345438; doi:10.1371/journal.pgen.1007902), 2019-01-24

## A) Number of CNVs by type

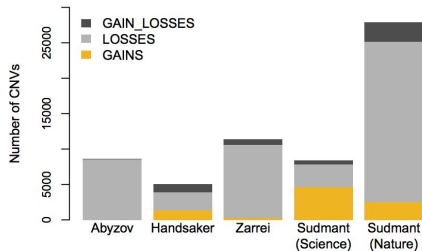

## B) CNV base pairs

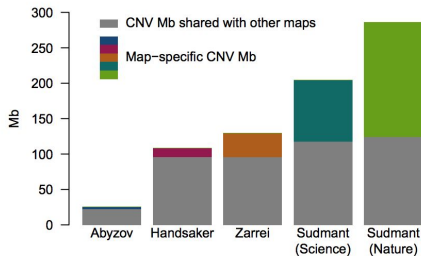

## C) CNV width

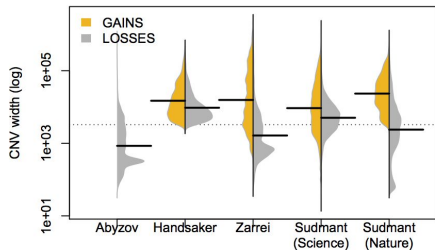

## D) Subjects and populations in the different studies

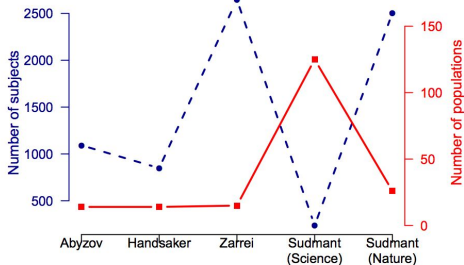

Supplement: pgen.1007902.s001.pdf [file pgen.1007902.s001.pdf]
