# Supplementary material for: Intronic CNVs and gene expression variation in human populations
Source: PubMed Central journal article supplement (PMC6345438; doi:10.1371/journal.pgen.1007902), 2019-01-24

# Enrichment of number of deletions in introns of different sizes

## A) Global background model

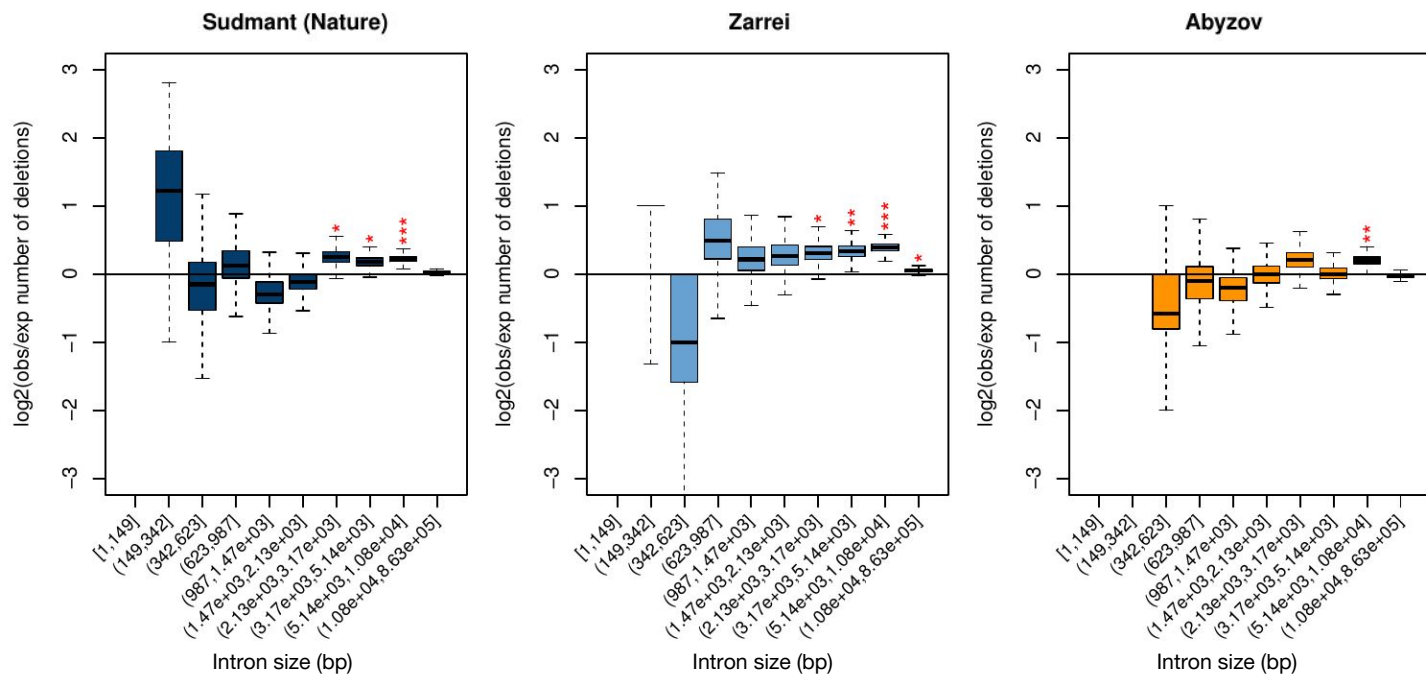

## B) Local background model

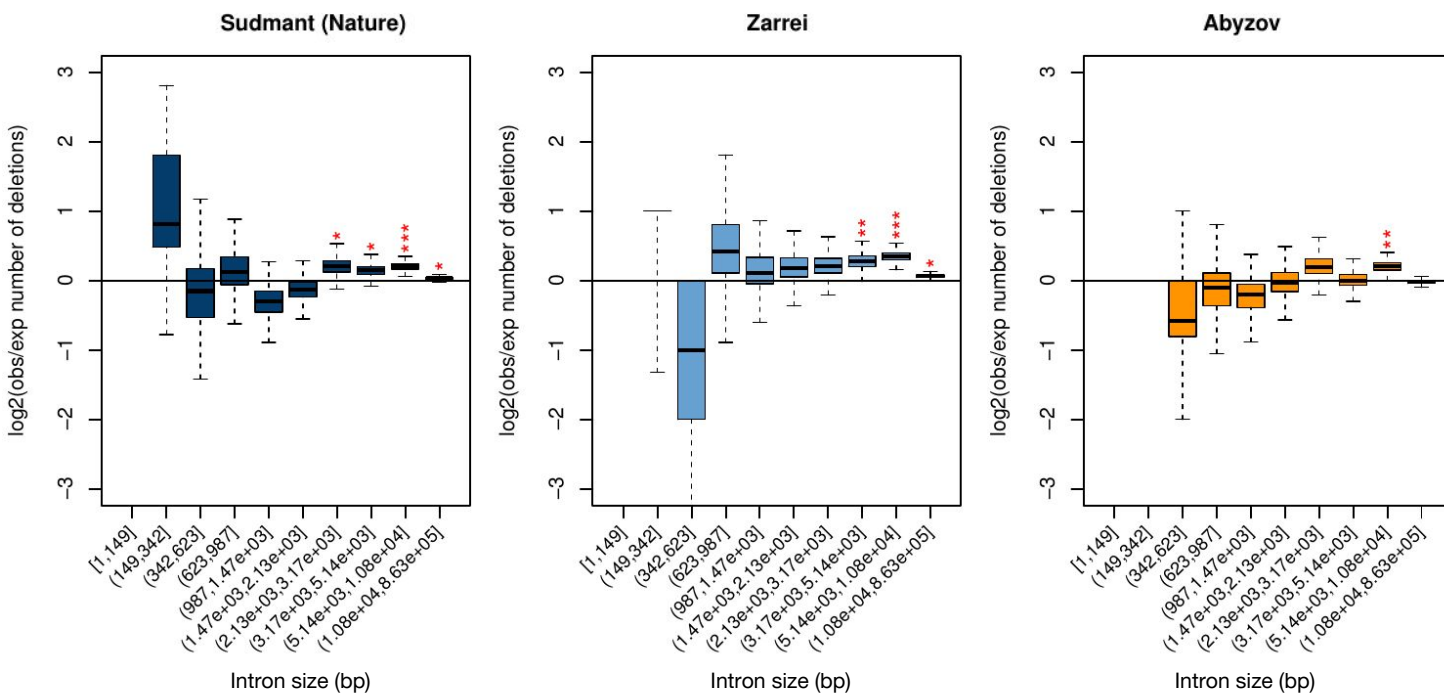

Supplement: pgen.1007902.s003.pdf [file pgen.1007902.s003.pdf]
