# Supplementary material for: Intronic CNVs and gene expression variation in human populations
Source: PubMed Central journal article supplement (PMC6345438; doi:10.1371/journal.pgen.1007902), 2019-01-24

# Enrichment of CNVs (including gains) in genes of different evolutionary ages

**Sudmant (Nature)**

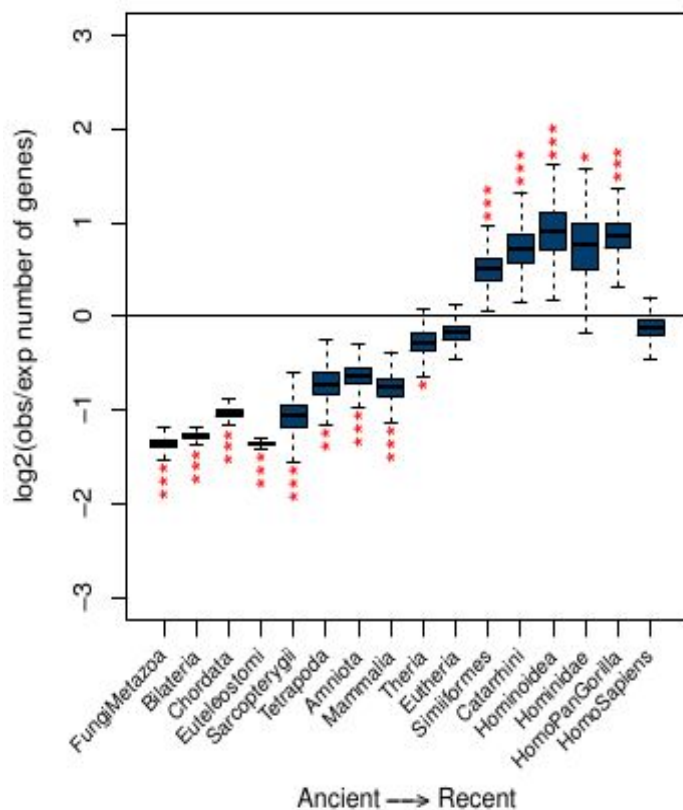

**Zarrei**

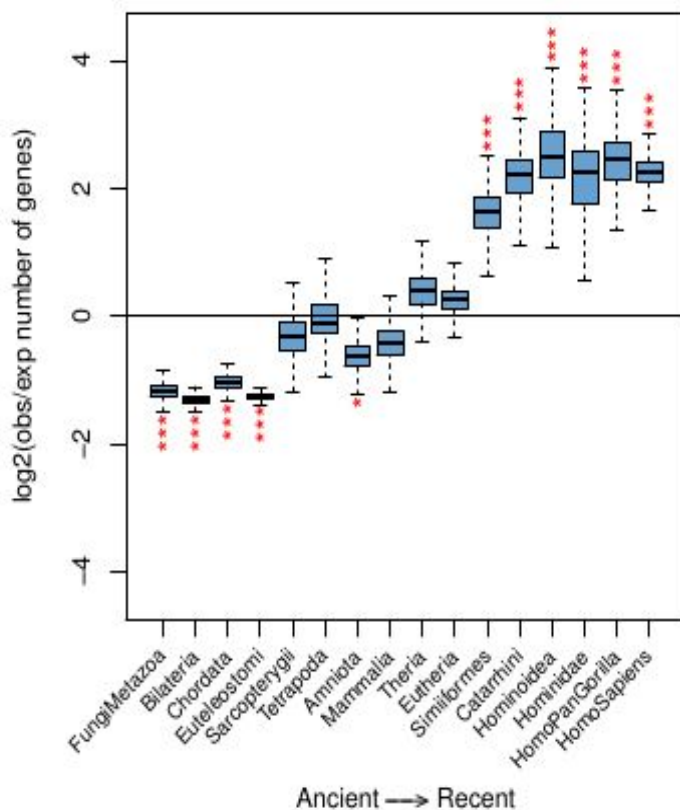

**Sudmant (Science)**

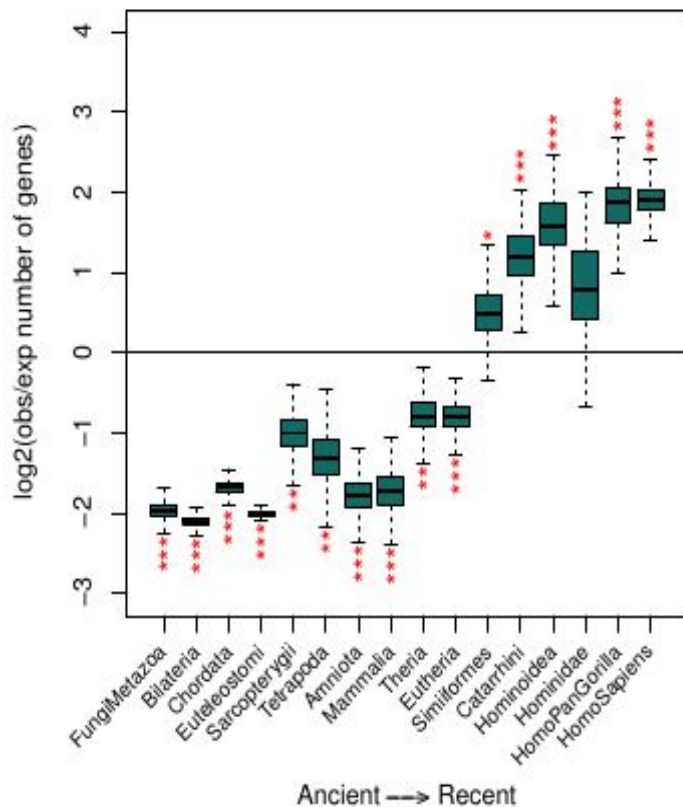

**Handsaker**

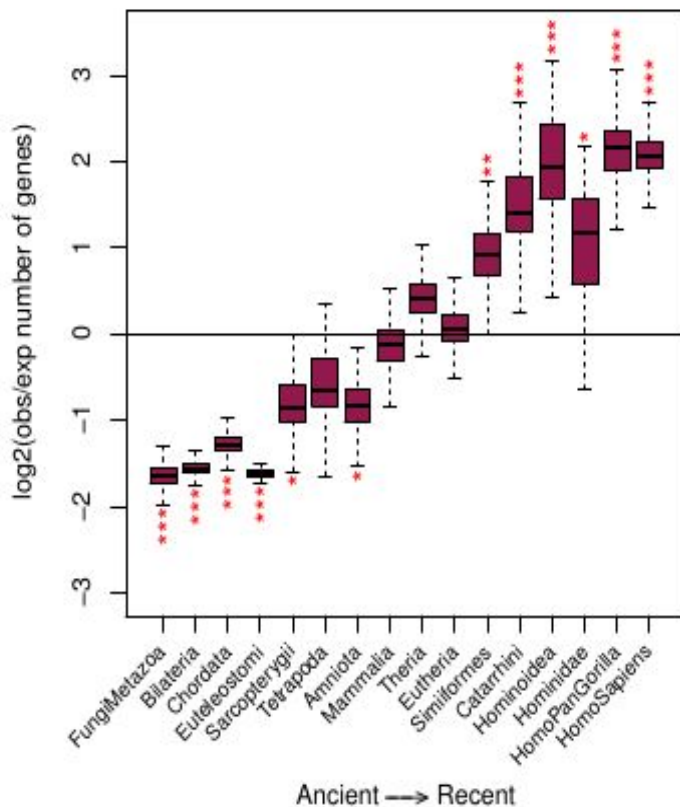

Supplement: pgen.1007902.s005.pdf [file pgen.1007902.s005.pdf]
