# Supplementary material for: Intronic CNVs and gene expression variation in human populations
Source: PubMed Central journal article supplement (PMC6345438; doi:10.1371/journal.pgen.1007902), 2019-01-24

# Percentage of genes with purely intronic or coding deletions

## A) Intronic deletions

Sudmant (Nature)

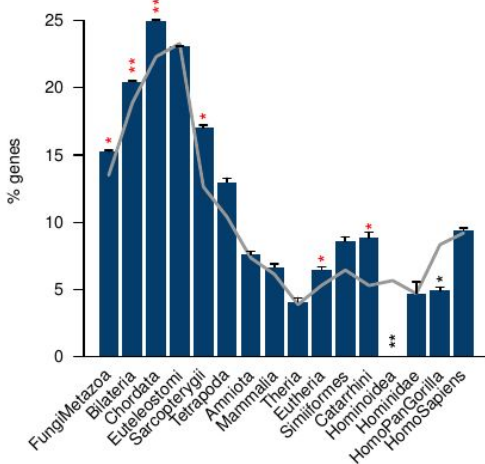

Zarrei

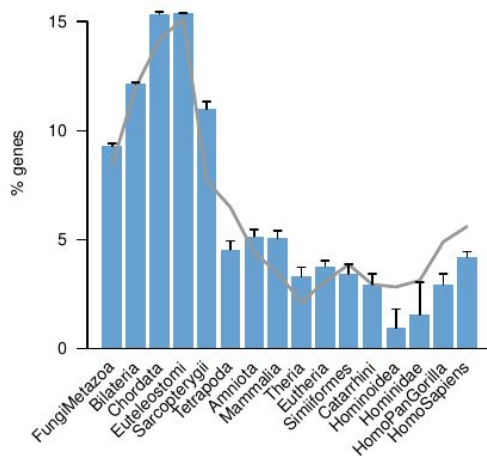

Abyzov

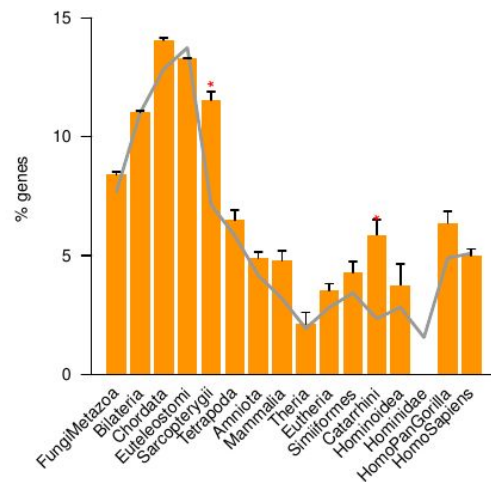

## B) Coding deletions

Sudmant (Nature)

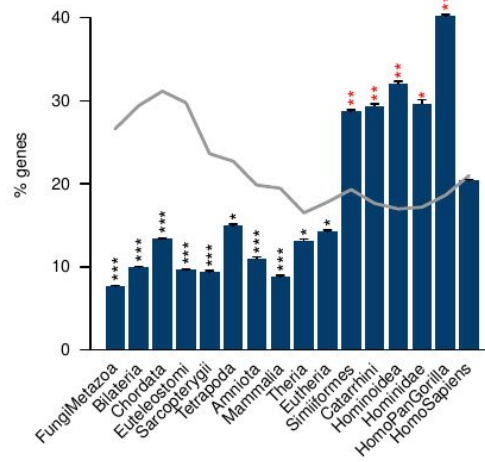

Zarrei

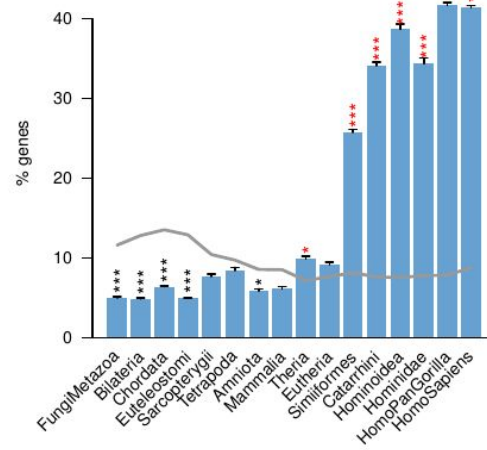

Abyzov

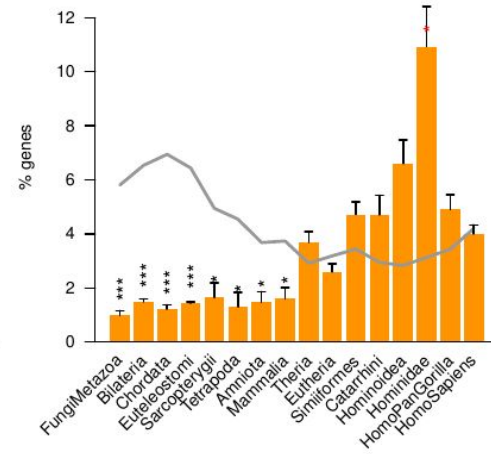

Supplement: pgen.1007902.s006.pdf [file pgen.1007902.s006.pdf]
