# Supplementary material for: Intronic CNVs and gene expression variation in human populations
Source: PubMed Central journal article supplement (PMC6345438; doi:10.1371/journal.pgen.1007902), 2019-01-24

### Sudmant (Nature)

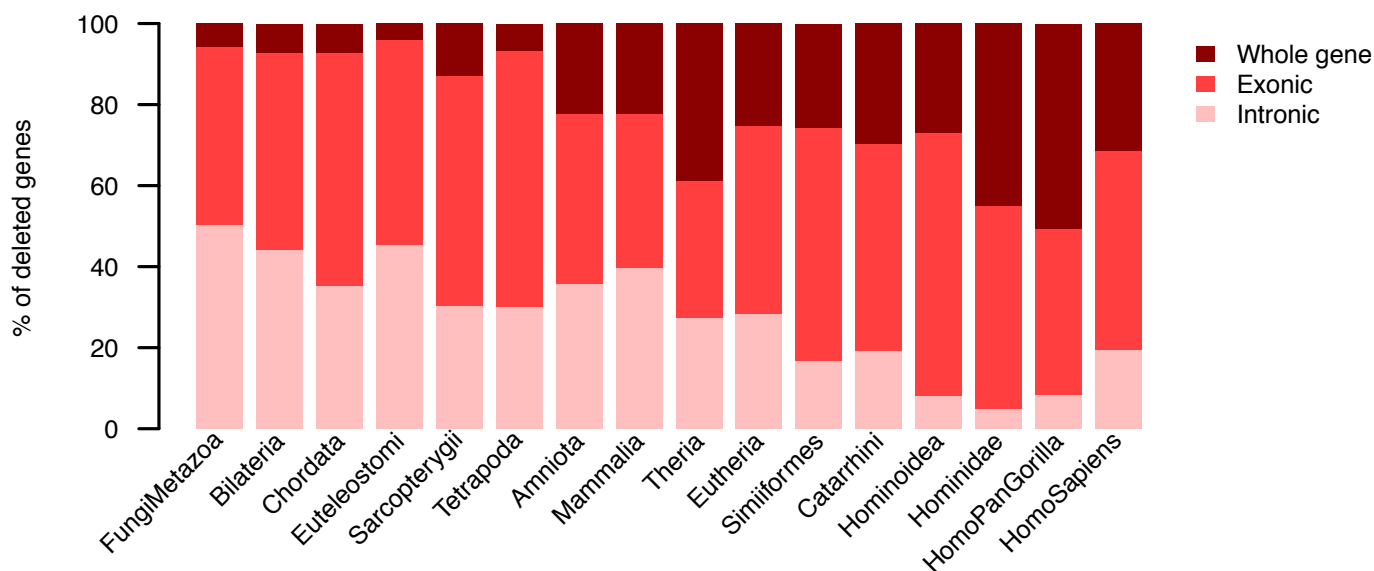

### Zarrei

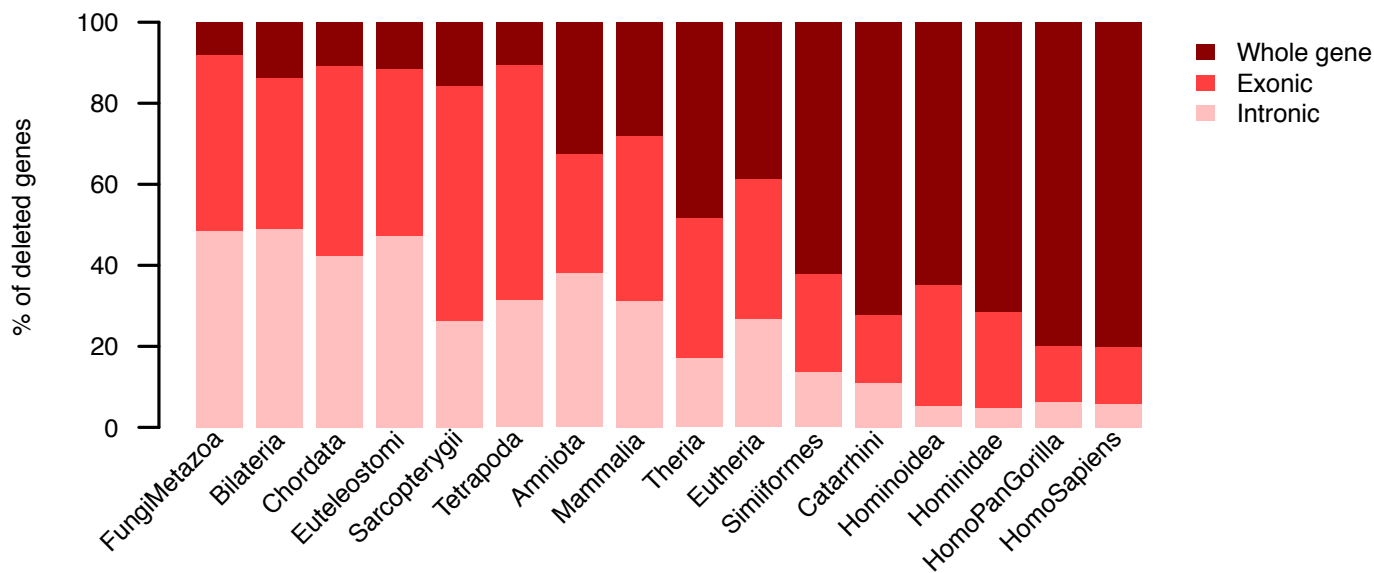

### Abyzov

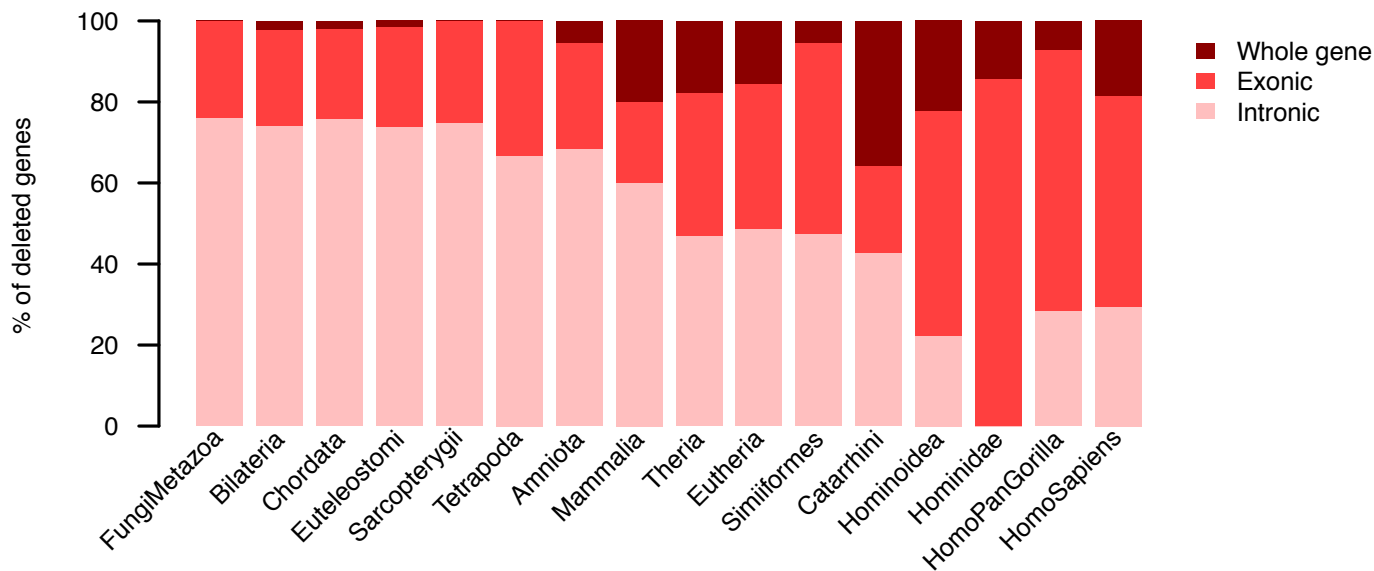

Supplement: pgen.1007902.s008.pdf [file pgen.1007902.s008.pdf]
