# Supplementary material for: Intronic CNVs and gene expression variation in human populations
Source: PubMed Central journal article supplement (PMC6345438; doi:10.1371/journal.pgen.1007902), 2019-01-24

A)

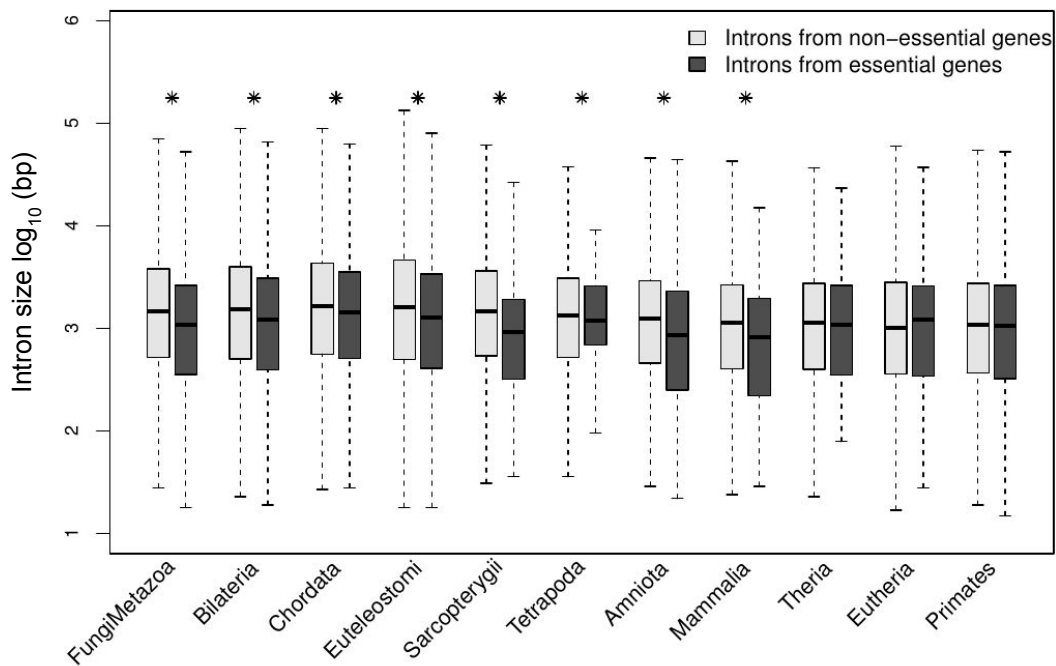

B)

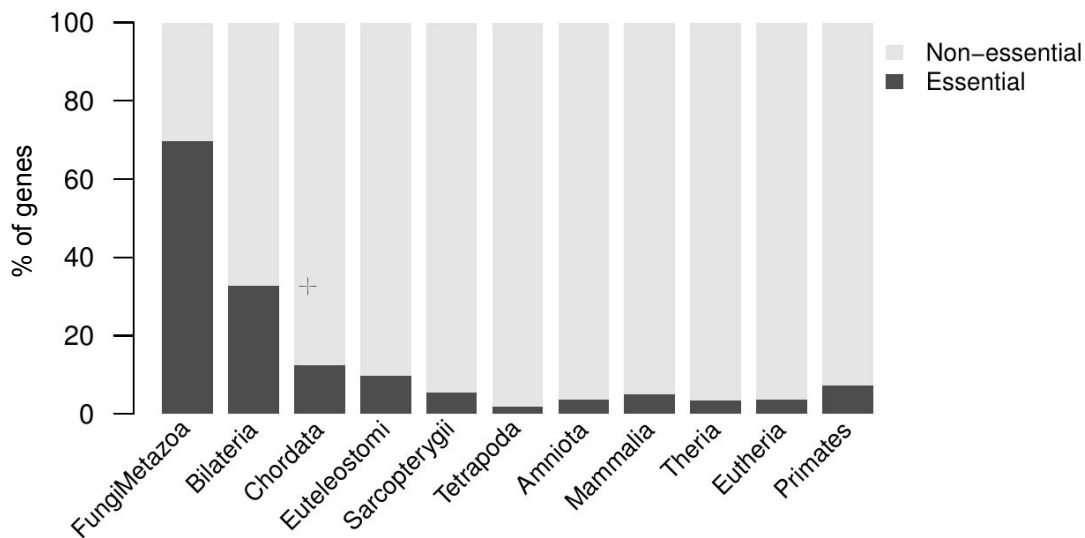

Supplement: pgen.1007902.s009.pdf [file pgen.1007902.s009.pdf]
