# Supplementary material for: Intronic CNVs and gene expression variation in human populations
Source: PubMed Central journal article supplement (PMC6345438; doi:10.1371/journal.pgen.1007902), 2019-01-24

# Stratified intronic eDeletions

## A) Characteristics of the intronic eDeletions and the gene that carries them

| Gene          | eDeletion                | Allele freq. | Type                    | FCs     | Adjusted P-value | max $V_{st}$ | Gene age     | RVIS  |
|---------------|--------------------------|--------------|-------------------------|---------|------------------|--------------|--------------|-------|
| <i>EXOC2</i>  | chr6:666377-667821       | 0.5651       | intronic ( <i>cis</i> ) | -1.1097 | 0.00028          | 0.307283     | Bilateria    | 3.34  |
| <i>SKAP2</i>  | chr7:26877406-26877456   | 0.0839       | intronic ( <i>cis</i> ) | -1.2070 | 0.00933          | 0.323179     | Euteleostomi | 64.26 |
| <i>PTGR1</i>  | chr9:114333161-114333923 | 0.0982       | intronic ( <i>cis</i> ) | -1.3235 | 0.01555          | 0.280086     | Bilateria    | 54.73 |
| <i>PHYHD1</i> | chr9:131700957-131702150 | 0.2596       | intronic ( <i>cis</i> ) | -1.9754 | 0.02005          | 0.251624     | Bilateria    | 87.20 |

## B) Gene expression in individuals carrying or not the deletion

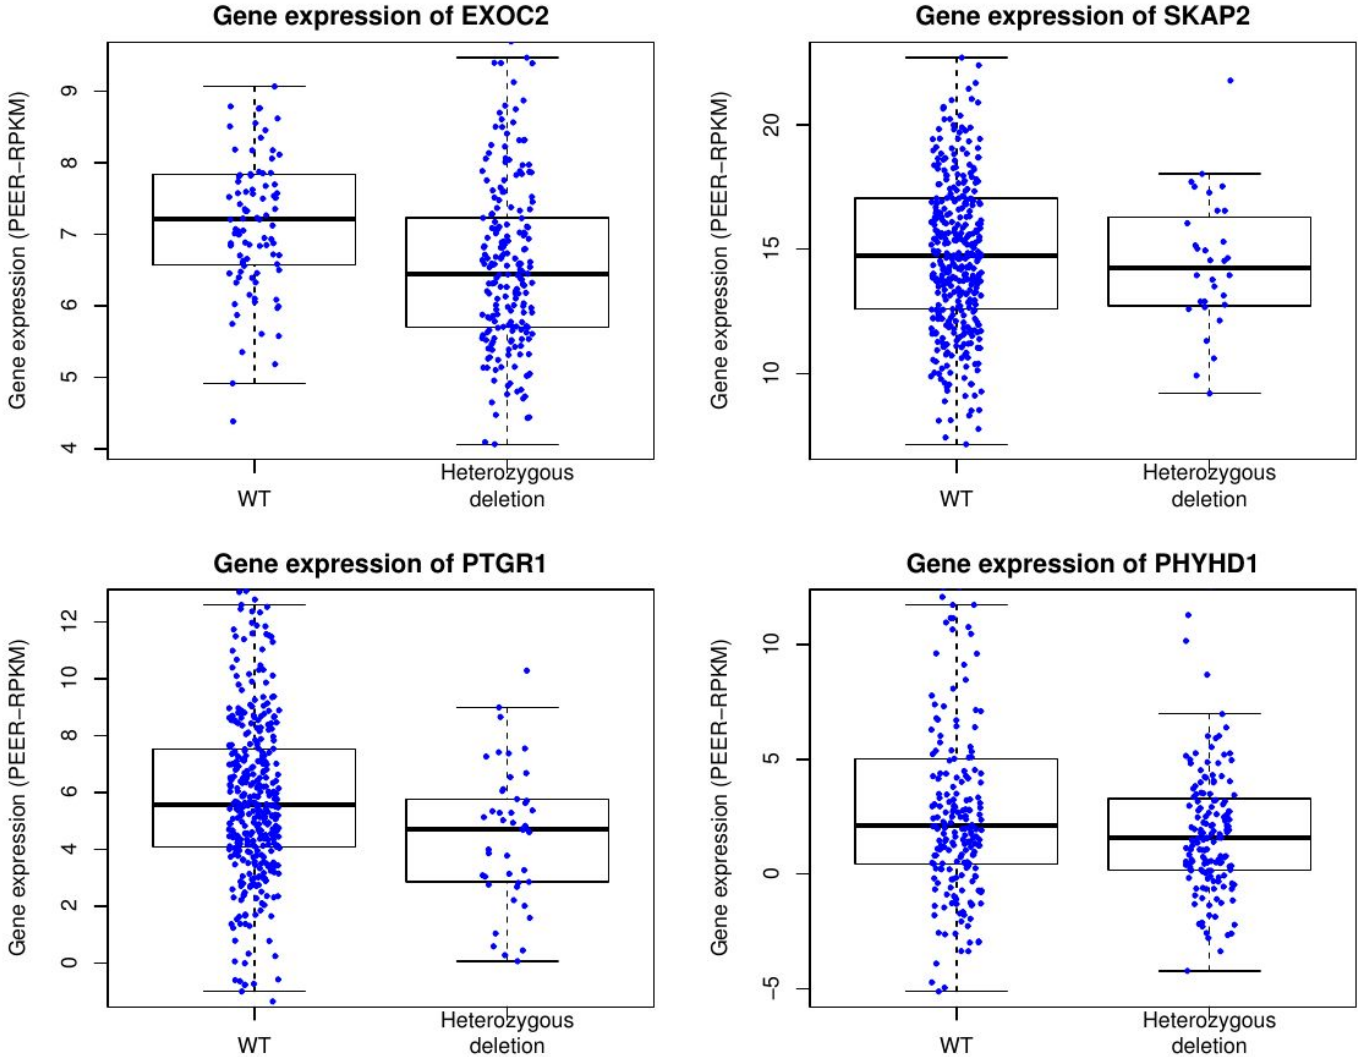

Supplement: pgen.1007902.s010.pdf [file pgen.1007902.s010.pdf]
