# Supplementary material for: Intronic CNVs and gene expression variation in human populations
Source: PubMed Central journal article supplement (PMC6345438; doi:10.1371/journal.pgen.1007902), 2019-01-24
Supplement: pgen.1007902.s012.pdf [file pgen.1007902.s012.pdf]

### RRM1

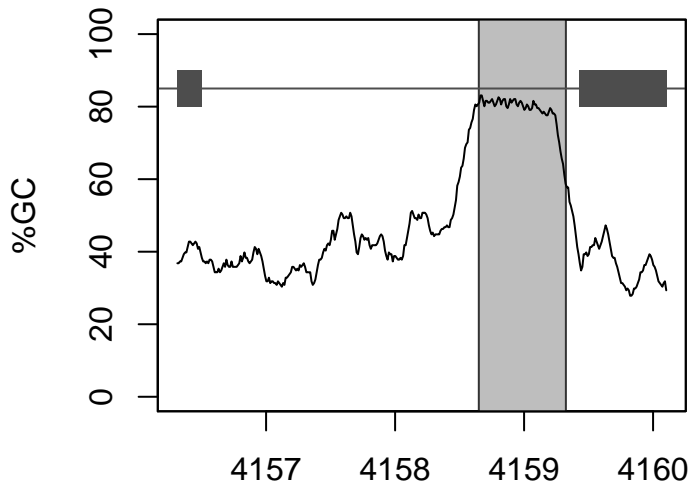

chr 11 (Kbp)

Gene size reduction: 1.5%

GC before deletion: 0.51

GC after deletion: 0.43

### TPTE

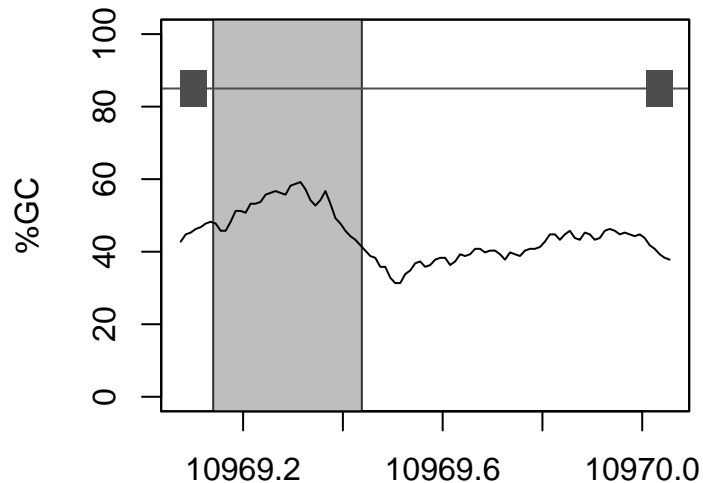

chr 21 (Kbp)

Gene size reduction: 0.4%

GC before deletion: 0.44

GC after deletion: 0.4
