# Supplementary material for: Intronic CNVs and gene expression variation in human populations
Source: PubMed Central journal article supplement (PMC6345438; doi:10.1371/journal.pgen.1007902), 2019-01-24

# Alu element content in deletions from Abyzov et al. 2015

**A)**

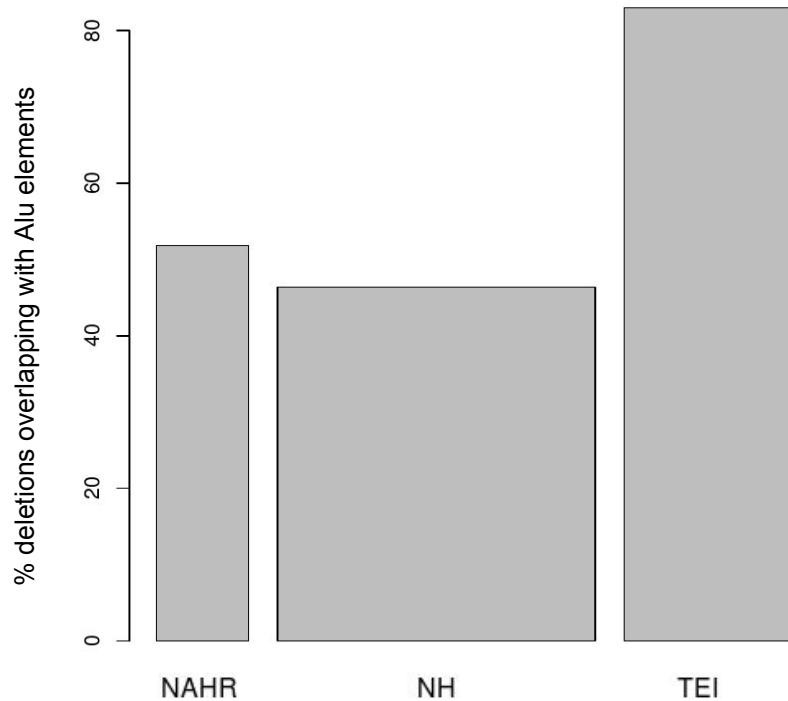

**B)**

**% of deletion overlapping with Alus  
(Only deletions overlapping Alus)**

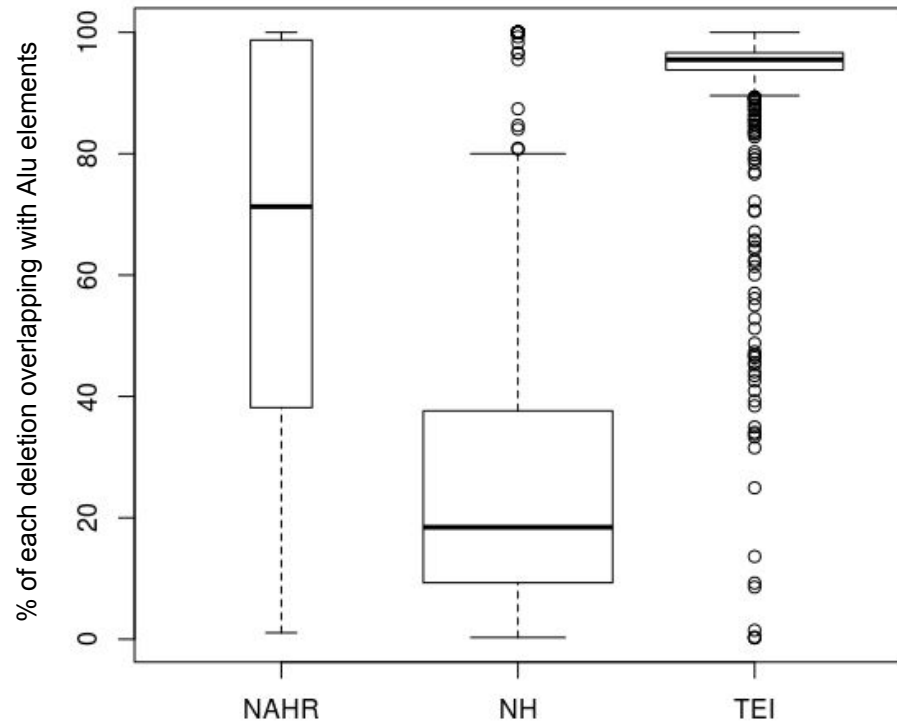

Supplement: pgen.1007902.s013.pdf [file pgen.1007902.s013.pdf]
