# Supplementary material for: Intronic CNVs and gene expression variation in human populations
Source: PubMed Central journal article supplement (PMC6345438; doi:10.1371/journal.pgen.1007902), 2019-01-24
Supplement: pgen.1007902.s014.pdf [file pgen.1007902.s014.pdf]

Number of individuals in each map, project the variants belong to and methods used for CNV detection.

| Map         | Abyzov                        | Handsaker                     | Zarrei                          | Sudmant (Science) | Sudmant (Nature)              |
|-------------|-------------------------------|-------------------------------|---------------------------------|-------------------|-------------------------------|
| Individuals | 1092                          | 849                           | 2647                            | 236               | 2504 (from 26 populations)    |
| Project     | 1000 Genomes Project, Phase 1 | 1000 Genomes Project, Phase 1 | Meta analysis of DGV collection |                   | 1000 Genomes Project, Phase 3 |
| Methods     | WGS, Split read               | WGS, Read -depth              | Multiple genome-wide techniques | WGS, Read-depth   | WGS, Multiple algorithms      |
