# Supplementary material for: Intronic CNVs and gene expression variation in human populations
Source: PubMed Central journal article supplement (PMC6345438; doi:10.1371/journal.pgen.1007902), 2019-01-24
Supplement: pgen.1007902.s018.pdf [file pgen.1007902.s018.pdf]

|                                                                                        | <b>Whole gene</b>      | <b>Exonic</b>           | <b>Intronic - cis</b>  | <b>Intronic - trans</b> | <b>Intergenic</b> |
|----------------------------------------------------------------------------------------|------------------------|-------------------------|------------------------|-------------------------|-------------------|
| Number of eTranscripts (number eDeletions)                                             | 22 <sup>***</sup> (11) | 135 <sup>***</sup> (92) | 217 <sup>*</sup> (199) | 81 (54)                 | 123 (96)          |
| Expected number of eTranscripts (median $\pm$ median absolute dev.)                    | 4 $\pm$ 1.48           | 67 $\pm$ 10.38          | 173 $\pm$ 19.27        | 75 $\pm$ 10.38          | 109 $\pm$ 13.34   |
| Number of genes $\geq$ 1 eTranscript                                                   | 11 <sup>**</sup>       | 87 <sup>***</sup>       | 185 <sup>**</sup>      | 65                      | 104               |
| Expected number of genes with $\geq$ 1 eTranscript (median $\pm$ median absolute dev.) | 4 $\pm$ 1.48           | 53 $\pm$ 7.41           | 143 $\pm$ 14.83        | 64 $\pm$ 8.90           | 94 $\pm$ 10.38    |
| Proportion of downregulated eTranscripts                                               | 100%                   | 91%                     | 79%                    | 81%                     | 89%               |
| Total genes tested for transcript differential expression (total deletions tested)     | 47 (43)                | 403 (440)               | 1401 (1886)            | 653 (319)               | 972 (529)         |
