# Supplementary material for: Intronic CNVs and gene expression variation in human populations
Source: PubMed Central journal article supplement (PMC6345438; doi:10.1371/journal.pgen.1007902), 2019-01-24
Supplement: pgen.1007902.s019.pdf [file pgen.1007902.s019.pdf]

## Overlap of intronic deletions with regulatory features.

| <b>log<sub>2</sub> Fold Change<br/>(p-value)</b> | Sudmant (Nature)      | Zarrei                | Abyzov                |
|--------------------------------------------------|-----------------------|-----------------------|-----------------------|
| CTCF binding site                                | <b>-0.18 (0.0072)</b> | -0.14 (0.11018 )      | <b>-0.81 (0.0001)</b> |
| Enhancer                                         | <b>-0.14 (0.0304)</b> | <b>-0.45 (0.0006)</b> | <b>-0.47 (0.0045)</b> |
